# Supplementary material
Source: PubMed Central journal article supplement (PMC6994247)

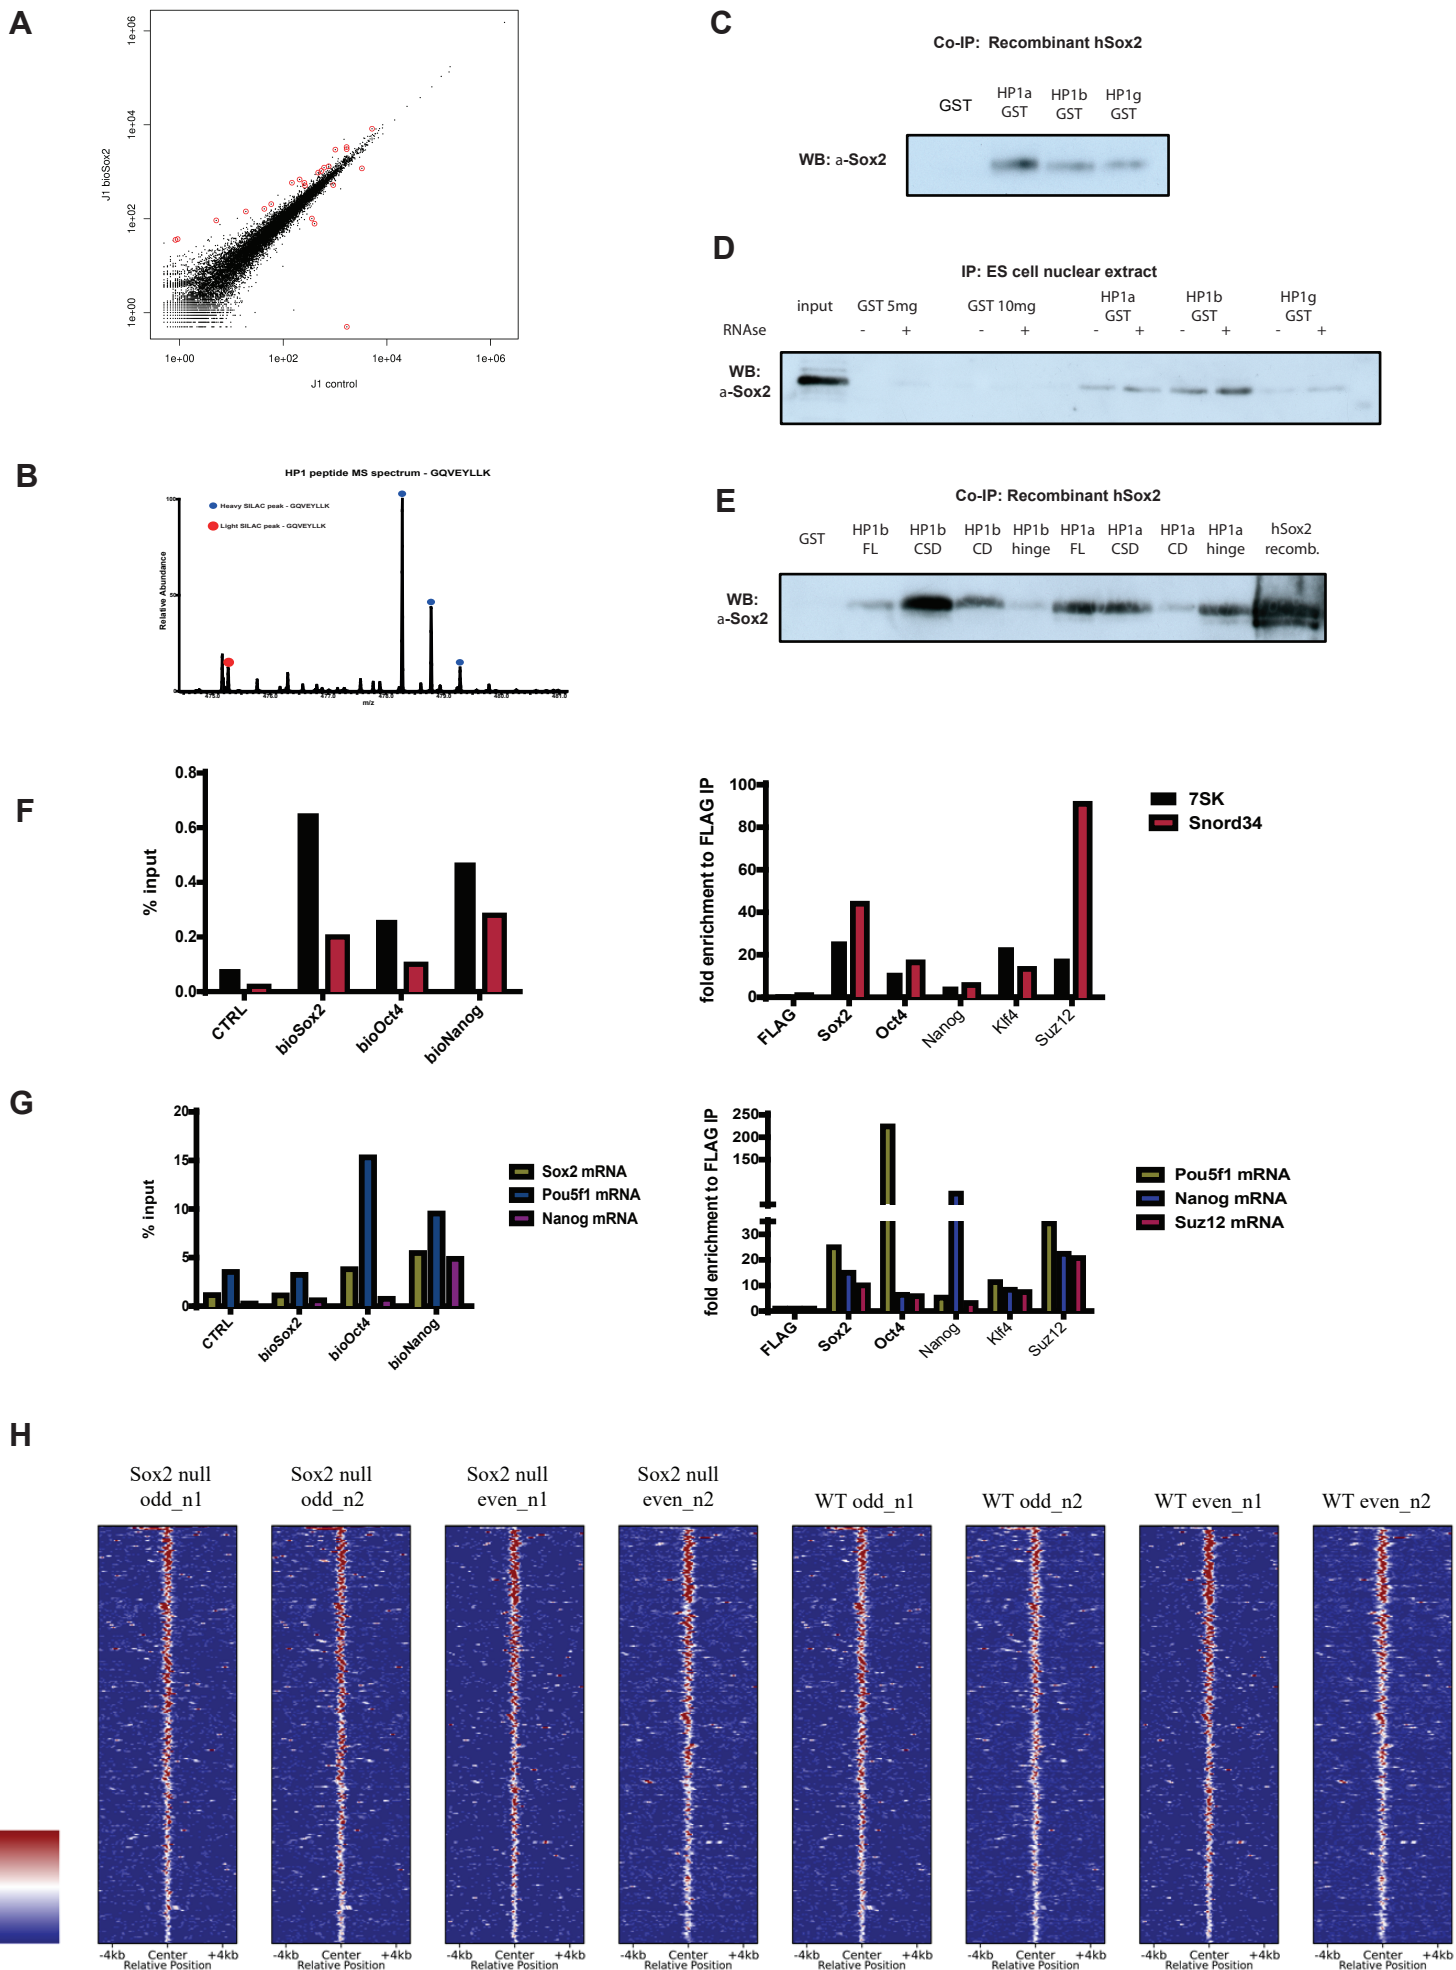

Supplement: EMS85623-supplement-Supplementary_Figure_1.pdf [file EMS85623-supplement-Supplementary_Figure_1.pdf]
